# Supplementary material for: Intergenerational Caregiving and Adolescent Depression in China: Mechanisms and Risk Factors
Source: Research Square preprint supplement (doi:10.21203/rs.3.rs-6887674/v1), 2025-07-11
Supplement: Supplementary file 1 [file 4128c815a199ca696cce54cb.docx]

**highlight**

Focuses on the association between intergenerational care and adolescent mental health in China, systematically analyzing the impact of intergenerational care on adolescent depression risk in general Chinese families, which enriches the research on mental health mechanisms.

Based on CFPS 2010–2020 panel data in China, employs fixed-effect models, Probit/Logit models, and robustness tests (e.g., changing clustering levels) to ensure result reliability.

Reveals heterogeneous effects on adolescent depression risk by gender, age, and urban-rural hukou in China, along with mediating pathways (academic performance, parent-child communication), supporting targeted intervention strategies.
